# Supplementary material for: A Group of Tumor-Suppressive micro-RNAs Changes Expression Coordinately in Colon Cancer
Source: MDPI journal article supplement (doi:10.3390/cimb45020063), 2023-01-20
Supplement: s1 [file s1]

**Table S1-** Enrichment analysis for transcription factors that regulate the expression of the four miRNAs [31]

| Nr | Category             | Term    |   | percent    | Fold change | <i>p</i> -value | Bonferroni |
|----|----------------------|---------|---|------------|-------------|-----------------|------------|
| 1  | Transcription factor | AP-1    | 1 | 0.07692308 | 25.46153846 | 0.04155275      | 1          |
| 2  | Transcription factor | AR      | 2 | 0.00485437 | 1.60679612  | 0.36902917      | 1          |
| 3  | Transcription factor | ARID3A  | 1 | 0.08333333 | 27.58333333 | 0.03862842      | 1          |
| 4  | Transcription factor | ARNTL   | 1 | 0.00364964 | 1.2080292   | 0.6051722       | 1          |
| 5  | Transcription factor | ATF1    | 1 | 0.01162791 | 3.84883721  | 0.23764541      | 1          |
| 6  | Transcription factor | ATF3    | 1 | 0.00653595 | 2.16339869  | 0.38958919      | 1          |
| 7  | Transcription factor | BCL11A  | 1 | 0.16666667 | 55.16666667 | 0.0209417       | 1          |
| 8  | Transcription factor | BCL6    | 1 | 0.00909091 | 3.00909091  | 0.2949974       | 1          |
| 9  | Transcription factor | BCOR    | 1 | 0.00662252 | 2.19205298  | 0.38541367      | 1          |
| 10 | Transcription factor | BHLHE40 | 1 | 0.00617284 | 2.04320988  | 0.40811634      | 1          |
| 11 | Transcription factor | BRCA1   | 1 | 0.01333333 | 4.41333333  | 0.2102208       | 1          |
| 12 | Transcription factor | BRD4    | 1 | 0.00271739 | 0.89945652  | 0.72852769      | 1          |
| 13 | Transcription factor | CBX3    | 2 | 0.00873362 | 2.89082969  | 0.14192734      | 1          |
| 14 | Transcription factor | CDK     | 1 | 0.5        | 165.5       | 0.00901573      | 0.9106     |
| 15 | Transcription factor | CDX2    | 1 | 0.16666667 | 55.16666667 | 0.0209417       | 1          |
| 16 | Transcription factor | CEBPA   | 1 | 0.01449275 | 4.79710145  | 0.19495365      | 1          |
| 17 | Transcription factor | CEBPB   | 1 | 0.0042735  | 1.41452991  | 0.54157779      | 1          |
| 18 | Transcription factor | CEBPD   | 1 | 0.02040816 | 6.75510204  | 0.14246035      | 1          |
| 19 | Transcription factor | CREB1   | 1 | 0.00163399 | 0.54084967  | 0.91629616      | 1          |
| 20 | Transcription factor | CTCF    | 1 | 0.00307692 | 1.01846154  | 0.67637737      | 1          |
| 21 | Transcription factor | CTCFL   | 1 | 0.00632911 | 2.09493671  | 0.39993491      | 1          |
| 22 | Transcription        | CTNNB1  | 1 | 0.05555556 | 18.38888889 | 0.05607442      | 1          |

|    |                      |        |   |            |              |            |        |
|----|----------------------|--------|---|------------|--------------|------------|--------|
|    | factor               |        |   |            |              |            |        |
| 23 | Transcription factor | CUX1   | 1 | 0.16666667 | 55.16666667  | 0.0209417  | 1      |
| 24 | Transcription factor | DNMT3A | 1 | 0.05555556 | 18.38888889  | 0.05607442 | 1      |
| 25 | Transcription factor | DNMT3B | 1 | 0.09090909 | 30.09090909  | 0.03569741 | 1      |
| 26 | Transcription factor | E2F1   | 2 | 0.00584795 | 1.93567251   | 0.27691178 | 1      |
| 27 | Transcription factor | E2F6   | 1 | 0.00310559 | 1.02795031   | 0.67247834 | 1      |
| 29 | Transcription factor | EBF1   | 1 | 0.01111111 | 3.67777778   | 0.24743869 | 1      |
| 29 | Transcription factor | EED    | 1 | 0.125      | 41.375       | 0.02686416 | 1      |
| 30 | Transcription factor | EGR3   | 1 | 0.33333333 | 110.33333333 | 0.01200738 | 1      |
| 31 | Transcription factor | EP300  | 2 | 0.00573066 | 1.89684814   | 0.28594371 | 1      |
| 32 | Transcription factor | EPAS1  | 1 | 0.0625     | 20.6875      | 0.0502857  | 1      |
| 33 | Transcription factor | ETS1   | 1 | 0.0033557  | 1.11073826   | 0.64000382 | 1      |
| 34 | Transcription factor | EZH2   | 2 | 0.02631579 | 8.71052632   | 0.01891926 | 1      |
| 35 | Transcription factor | FOS    | 1 | 0.00574713 | 1.90229885   | 0.43215926 | 1      |
| 36 | Transcription factor | FOXA2  | 1 | 0.01851852 | 6.12962963   | 0.15581742 | 1      |
| 37 | Transcription factor | FOXM1  | 1 | 0.01265823 | 4.18987342   | 0.22027756 | 1      |
| 38 | Transcription factor | FOXP3  | 1 | 0.14285714 | 47.28571429  | 0.0239063  | 1      |
| 39 | Transcription factor | GATA1  | 1 | 0.00471698 | 1.56132075   | 0.50348587 | 1      |
| 40 | Transcription factor | GATA2  | 1 | 0.02       | 6.62         | 0.14514435 | 1      |
| 41 | Transcription factor | GATA4  | 1 | 0.01369863 | 4.53424658   | 0.2051561  | 1      |
| 42 | Transcription factor | GATA6  | 1 | 0.02857143 | 9.45714286   | 0.10421666 | 1      |
| 43 | Transcription factor | GLI1   | 1 | 0.5        | 165.5        | 0.00901573 | 0.9106 |
| 44 | Transcription factor | HDAC1  | 1 | 0.025      | 8.275        | 0.11801892 | 1      |
| 45 | Transcription factor | HDAC3  | 1 | 0.02702703 | 8.94594595   | 0.10975686 | 1      |
| 46 | Transcription factor | HDAC4  | 1 | 0.11111111 | 36.77777778  | 0.02981529 | 1      |

|    |                      |        |   |            |              |            |        |
|----|----------------------|--------|---|------------|--------------|------------|--------|
| 47 | Transcription factor | HIF1A  | 2 | 0.00673401 | 2.22895623   | 0.22035915 | 1      |
| 48 | Transcription factor | HMGA1  | 1 | 0.2        | 66.2         | 0.01797035 | 1      |
| 49 | Transcription factor | HOXD10 | 1 | 0.5        | 165.5        | 0.00901573 | 0.9106 |
| 50 | Transcription factor | IL1B   | 1 | 0.33333333 | 110.33333333 | 0.01200738 | 1      |
| 51 | Transcription factor | IL4    | 1 | 0.5        | 165.5        | 0.00901573 | 0.9106 |
| 52 | Transcription factor | JUN    | 2 | 0.01162791 | 3.84883721   | 0.08562132 | 1      |
| 53 | Transcription factor | JUNB   | 1 | 0.09090909 | 30.09090909  | 0.03569741 | 1      |
| 54 | Transcription factor | JUND   | 1 | 0.0044843  | 1.48430493   | 0.52281685 | 1      |
| 55 | Transcription factor | KDM5B  | 1 | 0.00170358 | 0.56388416   | 0.90393358 | 1      |
| 56 | Transcription factor | KMT2A  | 2 | 0.01709402 | 5.65811966   | 0.04236922 | 1      |
| 57 | Transcription factor | MAX    | 2 | 0.00272851 | 0.90313779   | 0.76345695 | 1      |
| 58 | Transcription factor | MAZ    | 1 | 0.00200401 | 0.66332665   | 0.84929022 | 1      |
| 59 | Transcription factor | MED1   | 1 | 0.003367   | 1.11447811   | 0.63860033 | 1      |
| 60 | Transcription factor | MITF   | 2 | 0.03703704 | 12.25925926  | 0.00992569 | 1      |
| 61 | Transcription factor | MTA3   | 1 | 0.0625     | 20.6875      | 0.0502857  | 1      |
| 62 | Transcription factor | MYC    | 4 | 0.00630915 | 2.08832808   | 0.05301058 | 1      |
| 63 | Transcription factor | NFE2L2 | 2 | 0.02777778 | 9.19444444   | 0.01708752 | 1      |
| 64 | Transcription factor | NFKB1  | 2 | 0.01550388 | 5.13178295   | 0.05073385 | 1      |
| 65 | Transcription factor | NFKB2  | 1 | 0.04347826 | 14.39130435  | 0.07043045 | 1      |
| 66 | Transcription factor | NR1H4  | 1 | 0.16666667 | 55.16666667  | 0.0209417  | 1      |
| 67 | Transcription factor | NR3C1  | 1 | 0.00628931 | 2.08176101   | 0.40198817 | 1      |
| 68 | Transcription factor | NRF1   | 1 | 0.00274725 | 0.90934066   | 0.72396282 | 1      |
| 69 | Transcription factor | PAX5   | 1 | 0.00980392 | 3.24509804   | 0.27625301 | 1      |
| 70 | Transcription factor | PML    | 1 | 0.00869565 | 2.87826087   | 0.30652624 | 1      |
| 71 | Transcription        | PPARG  | 2 | 0.04651163 | 15.39534884  | 0.00645334 | 0.6518 |

|    |                      |         |   |            |             |            |         |
|----|----------------------|---------|---|------------|-------------|------------|---------|
|    | factor               |         |   |            |             |            |         |
| 72 | Transcription factor | RB1     | 1 | 0.04545455 | 15.04545455 | 0.06757244 | 1       |
| 73 | Transcription factor | RBBP5   | 1 | 0.02380952 | 7.88095238  | 0.12349493 | 1       |
| 74 | Transcription factor | RCOR1   | 1 | 0.01754386 | 5.80701754  | 0.16375639 | 1       |
| 75 | Transcription factor | RELA    | 2 | 0.00454545 | 1.50454545  | 0.40651385 | 1       |
| 76 | Transcription factor | REST    | 1 | 0.00452489 | 1.49773756  | 0.51934486 | 1       |
| 77 | Transcription factor | RFX5    | 1 | 0.01010101 | 3.34343434  | 0.2691284  | 1       |
| 78 | Transcription factor | RUNX3   | 1 | 0.00632911 | 2.09493671  | 0.39993491 | 1       |
| 79 | Transcription factor | SMAD1   | 1 | 0.02272727 | 7.52272727  | 0.1289454  | 1       |
| 80 | Transcription factor | SOX9    | 1 | 0.015625   | 5.171875    | 0.18206284 | 1       |
| 81 | Transcription factor | SP1     | 2 | 0.00383142 | 1.26819923  | 0.51553093 | 1       |
| 82 | Transcription factor | SPI1    | 1 | 0.00358423 | 1.18637993  | 0.61262861 | 1       |
| 83 | Transcription factor | STAT1   | 2 | 0.00445434 | 1.47438753  | 0.4185747  | 1       |
| 84 | Transcription factor | STAT3   | 3 | 0.01119403 | 3.70522388  | 0.02858138 | 1       |
| 85 | Transcription factor | STAT5A  | 1 | 0.05882353 | 19.47058824 | 0.05318338 | 1       |
| 86 | Transcription factor | STAT5B  | 1 | 0.07142857 | 23.64285714 | 0.04447039 | 1       |
| 87 | Transcription factor | SUMO2   | 1 | 0.00342466 | 1.13356164  | 0.6315212  | 1       |
| 88 | Transcription factor | TAF1    | 1 | 0.00176991 | 0.58584071  | 0.89196447 | 1       |
| 89 | Transcription factor | TBL1XR1 | 1 | 0.03225806 | 10.67741935 | 0.09305872 | 1       |
| 90 | Transcription factor | TCF12   | 1 | 0.00534759 | 1.77005348  | 0.45737112 | 1       |
| 91 | Transcription factor | TCF4    | 1 | 0.00884956 | 2.92920354  | 0.30193181 | 1       |
| 92 | Transcription factor | TFAP4   | 1 | 0.00465116 | 1.53953488  | 0.50881514 | 1       |
| 93 | Transcription factor | TGFB1   | 3 | 0.09677419 | 32.03225806 | 0.00006038 | 6.10e-3 |
| 94 | Transcription factor | TLR2    | 1 | 0.25       | 82.75       | 0.01499225 | 1       |
| 95 | Transcription factor | TNFSF12 | 1 | 0.14285714 | 47.28571429 | 0.0239063  | 1       |

|     |                      |        |   |            |             |            |        |
|-----|----------------------|--------|---|------------|-------------|------------|--------|
| 96  | Transcription factor | TP53   | 3 | 0.01863354 | 6.16770186  | 0.00673744 | 0.6805 |
| 97  | Transcription factor | TRIM25 | 1 | 0.01587302 | 5.25396825  | 0.17946622 | 1      |
| 98  | Transcription factor | TRIM28 | 2 | 0.00854701 | 2.82905983  | 0.1473263  | 1      |
| 99  | Transcription factor | YY1    | 2 | 0.0052356  | 1.73298429  | 0.32913954 | 1      |
| 100 | Transcription factor | ZBTB16 | 1 | 0.04761905 | 15.76190476 | 0.06470784 | 1      |
| 101 | Transcription factor | ZNF143 | 1 | 0.00322581 | 1.06774194  | 0.65652885 | 1      |
