# Supplementary material for: A Group of Tumor-Suppressive micro-RNAs Changes Expression Coordinately in Colon Cancer
Source: Curr Issues Mol Biol. 2023 Jan 20;45(2):975–89. doi: 10.3390/cimb45020063 (PMC9955927; doi:10.3390/cimb45020063)
Supplement: Supplementary file 1 [file cimb-45-00063-s001.zip]

Archive with 4 entries (4 files):
- Figure S1- Enrichment map with annotations.tif
- Supplementary Figure S1 with legend.pdf
- Supplementary Table S1-Enrichment TF-miRNA.pdf
- Supplementary Table S2-Network modules.pdf
